# Supplementary material for: How Were Return-of-Service Schemes Developed and Implemented in Botswana, Eswatini and Lesotho?
Source: MDPI journal article supplement (doi:10.3390/healthcare11101512), 2023-05-22
Supplement: s1 [file s1]

## Supplementary S1

### Data Extraction: Policy Review

#### A. General Information and Eligibility

|                                            |         |  |
|--------------------------------------------|---------|--|
| 1. Date form completed                     |         |  |
| 2. Name of person extracting data          |         |  |
| 3. Report title                            |         |  |
| 4. Publication type                        |         |  |
| 5. Type of document                        |         |  |
| 6. Publication reference                   |         |  |
| 7. Country of publication                  |         |  |
| 8. Province                                |         |  |
| 9. Policy description                      |         |  |
| 10. Decision                               | Include |  |
|                                            | Exclude |  |
| 11. Notes (include reasons for exclusion): |         |  |
|                                            |         |  |

\*No continuation if excluded.

#### B. Context

| Contextual variable                 | Description | Location in document |
|-------------------------------------|-------------|----------------------|
| 12. Date of publication             |             |                      |
| 13. Version number                  |             |                      |
| 14. Prior version Review Date       |             |                      |
| 15. Current version review Date     |             |                      |
| 16. Policy motivation and rationale |             |                      |
| 17. Policy history                  |             |                      |
| 18. Acts which informed policy      |             |                      |
| 19. Target beneficiaries            |             |                      |
| 20. Any other contextual issues     |             |                      |

### C. Policy Content

| Factor                                                               | Description | Location in document |
|----------------------------------------------------------------------|-------------|----------------------|
| 21. Classification of beneficiaries                                  |             |                      |
| 22. Beneficiary selection criteria                                   |             |                      |
| 23. Policy objectives and/or purpose                                 |             |                      |
| 24. Skills-mix of beneficiaries                                      |             |                      |
| 25. Conditions of the funding                                        |             |                      |
| 26. Duration of funding                                              |             |                      |
| 27. Budgetary implications                                           |             |                      |
| 28. Administration of scheme                                         |             |                      |
| 29. Beneficiary responsibilities                                     |             |                      |
| 30. Person/body responsible for admitting beneficiaries into scheme. |             |                      |
| 31. Any other factors:                                               |             |                      |

### D. Process Implementation

| Process                                                  | Description | Location in document |
|----------------------------------------------------------|-------------|----------------------|
| 32. Statutory conditions for validity of policy/contract |             |                      |
| 33. Term of policy                                       |             |                      |
| 34. Trigger for review of policy                         |             |                      |
| 35. Trigger for evaluation of policy                     |             |                      |
| 36. Skills or service needs determination process        |             |                      |
| 37. Beneficiary selection process                        |             |                      |
| 38. Contract renewal process                             |             |                      |
| 39. Beneficiary monitoring processes                     |             |                      |

|                                                                          |  |  |
|--------------------------------------------------------------------------|--|--|
| 40. Placement of beneficiaries into services after completion of studies |  |  |
| 41. Any other processes                                                  |  |  |

#### **E. Actors Involved**

| <b>Actors</b> | <b>Description</b> | <b>Location in document</b> |
|---------------|--------------------|-----------------------------|
|               |                    |                             |
|               |                    |                             |
|               |                    |                             |
|               |                    |                             |
|               |                    |                             |

#### **F. Conclusion**

| <b>Remark</b> | <b>Description</b> | <b>Location in document</b> |
|---------------|--------------------|-----------------------------|
|               |                    |                             |
|               |                    |                             |
|               |                    |                             |
|               |                    |                             |
|               |                    |                             |

**Supplementary S2: Interview Guide - Policymakers**

**Individual or Group Interview sheet and interview guide for return-of-service scheme policymakers and/or policy-implementers**

---

Thank you so much for agreeing to take time from your busy schedule to answer a few questions on my research. I am doing a research study to find out more about the government policies used to fund health professionals in-training, in exchange for a period of service in the public health sector. The study aims to understand more about the history and evolution of these policies, how they relate with other human resources for health policies, their rationale, and how they are monitored and reviewed.

You are being interviewed because you are a manager that is involved in some way with the development and/or administration of policies that inform government sponsored bursaries or scholarships for health sciences students studying in the country or in other countries.

A group interview allows for a detailed discussion with a diverse group from the different units and divisions at once instead of hosting multitude of interviews with individuals within the department. That is the main reason why I have asked you to participate in the group interview. (For those who are unable to participate in a group interview this will read: I understand that it wasn't possible for you to be part of a group interview due to your schedule. Because I value your contribution it is for this reason that I still requested to have an individual discussion with you). Please do not be intimidated by anyone as the information collected will only be used to enrich the schemes. All the names from this discussion will be de-identified and your identified responses will not be shared outside the research team. Your individual and diverse inputs are therefore highly valued. The aim of the research is not to assess professional competence and the outcomes of the research will not have a negative impact on your employment. In addition, you are welcome to refer to internal human resources and/or bursary/scholarship scheme related documents or even consult colleagues who you think might help remind you of detail that you might have forgotten. It's also ok to not have all the answers. Please remember that the session is being audio recorded. You are welcome to let me know if you are not comfortable with that.

If you are happy with contents of this document and agree with the process could you kindly sign the consent forms and return to me before we start, if you haven't already done so. I am happy to answer any questions that you may have before we begin the discussion. Are there any questions that any of you would like to ask on the process before we start?

| No. | Area of Interest/topic              | Initial broad descriptive questions                                                                                                                                                                                                                                                                                                                                                                                                                                                                                                                                    | Possible probing questions                                                                                                                                                                                          |
|-----|-------------------------------------|------------------------------------------------------------------------------------------------------------------------------------------------------------------------------------------------------------------------------------------------------------------------------------------------------------------------------------------------------------------------------------------------------------------------------------------------------------------------------------------------------------------------------------------------------------------------|---------------------------------------------------------------------------------------------------------------------------------------------------------------------------------------------------------------------|
| 1   | Origins and evolution of the policy | <ul style="list-style-type: none"> <li>- What is the departmental policy on bursaries for health sciences students?</li> <li>- What are the policy objectives?</li> <li>- In your understanding and knowledge, what has influenced the bursary policy for health sciences students?</li> <li>- As far as you know, when was this policy first introduced?</li> <li>- Could you enlighten me more about the development process and implementation of the bursary policy?</li> <li>- Which countries do beneficiaries of the policy go to for their studies?</li> </ul> | <ul style="list-style-type: none"> <li>- Could you please tell me more about any policy development frameworks used for developing your bursary policy or any other human resources for health policies?</li> </ul> |
| 2   | Custodian of the policy             | <ul style="list-style-type: none"> <li>- Could you let me know which department or departments is or are responsible for the development and implementation of the bursary policy?</li> <li>- Could you give more information about the role of any other departments, offices or sections that could be involved?</li> <li>- Who makes the final decision on who receives an offer?</li> </ul>                                                                                                                                                                        | <ul style="list-style-type: none"> <li>- How long has the situation been that way?</li> <li>- How has the process evolved over time</li> </ul>                                                                      |
| 3   | Review of the policy                | <ul style="list-style-type: none"> <li>- Is the bursary policy regularly reviewed?</li> <li>- What informs the reviewing of this policy?</li> </ul>                                                                                                                                                                                                                                                                                                                                                                                                                    | <ul style="list-style-type: none"> <li>- Is this related to political term?</li> <li>- What informs the need to review this policy?</li> </ul>                                                                      |
| 4   | Decision process                    | <ul style="list-style-type: none"> <li>- Could you tell me more about the process that informs the number of beneficiaries that can be funded in any particular funding cycle?</li> <li>- How are the opportunities advertised?</li> </ul>                                                                                                                                                                                                                                                                                                                             | <ul style="list-style-type: none"> <li>- How do you decide between the various categories of health sciences students that you fund?</li> </ul>                                                                     |

|   |                                         |                                                                                                                                                                                                                                                                                                                                                                                                                                         |                                                                                                                                                                                                                                                                        |
|---|-----------------------------------------|-----------------------------------------------------------------------------------------------------------------------------------------------------------------------------------------------------------------------------------------------------------------------------------------------------------------------------------------------------------------------------------------------------------------------------------------|------------------------------------------------------------------------------------------------------------------------------------------------------------------------------------------------------------------------------------------------------------------------|
|   |                                         | <ul style="list-style-type: none"> <li>- Can you tell me more about the selection criteria used to then select beneficiaries?</li> </ul>                                                                                                                                                                                                                                                                                                |                                                                                                                                                                                                                                                                        |
| 5 | Contract                                | <ul style="list-style-type: none"> <li>- In your view, what are the responsibilities of bursary recipients?</li> <li>- At what stage of the bursary offer do beneficiaries sign their contract?</li> <li>- What are the key contents of the contract?</li> <li>- What happens if a beneficiary defaults their contract?</li> </ul>                                                                                                      | <ul style="list-style-type: none"> <li>- Is there an opt-out clause to the scheme? Elaborate...</li> <li>- What happens if a beneficiary doesn't complete their studies?</li> </ul>                                                                                    |
| 6 | Process after the completion of studies | <ul style="list-style-type: none"> <li>- How are the new graduates recruited into the health system?</li> <li>- At what stage of the process do you decide on the facility where the recipient will be placed in the health system?</li> <li>- What processes are used to identify the types of facilities that need the placement of beneficiaries?</li> <li>- At what stage do you plan for the salaries of beneficiaries?</li> </ul> | <ul style="list-style-type: none"> <li>- Are beneficiaries placed based on their own choices or on facilities chosen by government?</li> <li>- Who decides on the placement of graduates who previously benefited from the bursary scheme?</li> </ul>                  |
| 7 | Policy Challenges                       | <ul style="list-style-type: none"> <li>- What challenges has the policy encountered over the years?</li> </ul>                                                                                                                                                                                                                                                                                                                          | <ul style="list-style-type: none"> <li>- To your knowledge, have recipients defaulted their contracts previously?</li> <li>- What could be the reasons for beneficiaries to default bursary contracts?</li> <li>- What is the sustainability of the policy?</li> </ul> |
| 8 | Monitoring and evaluation of the policy | <ul style="list-style-type: none"> <li>- What processes are in place to ensure that beneficiaries fulfil their contractual obligations?</li> <li>- How often or uniformly are penalties imposed on those who default their contracts?</li> </ul>                                                                                                                                                                                        | <ul style="list-style-type: none"> <li>- What Information systems are in place to monitor fulfilment of the policy?</li> </ul>                                                                                                                                         |

**Date of administration:**

**Ethics approval number: HC200519**

|  |  |                                                                                                                                                                                                                                                                                                                                                                   |  |
|--|--|-------------------------------------------------------------------------------------------------------------------------------------------------------------------------------------------------------------------------------------------------------------------------------------------------------------------------------------------------------------------|--|
|  |  | <ul style="list-style-type: none"><li>- What features help or hinder monitoring of the program?</li><li>- In your view, does the policy fulfil its objective?</li><li>- If there is anything that you could change in the policy what would it be?</li><li>- In your view, what are the ways that could have helped eliminate defaulting of the scheme?</li></ul> |  |
|--|--|-------------------------------------------------------------------------------------------------------------------------------------------------------------------------------------------------------------------------------------------------------------------------------------------------------------------------------------------------------------------|--|

### **Wrap-up**

Are there any other issues not covered that you would like to talk about?

**Thank you once more for your assistance, could you please also help me with a few documents that will help broaden my understanding on the schemes. You could add any other documents to the list if you think it or they will be of importance.**

| <b>List of documents to be requested</b>                                                                                                                                                           |
|----------------------------------------------------------------------------------------------------------------------------------------------------------------------------------------------------|
| 1. All versions of bursary policy (current and historical) that are used to fund skilled health professionals.                                                                                     |
| 2. Blank copies of bursary contracts.                                                                                                                                                              |
| 3. Total health budget for the period 2000 to 2020.                                                                                                                                                |
| 4. Health sciences bursary budget for the period 2000 to 2020.                                                                                                                                     |
| 5. The total number of skilled health professionals (stratified by category and health facility) on 01 July 2020.                                                                                  |
| 6. The total number of skilled health professionals who are bursary beneficiaries (stratified by category and health facility) employed in the contracted government service area on 01 July 2020. |
| 7. Annual performance plans for the period 01 April 2015 to 31 March 2020.                                                                                                                         |
| 8. Annual performance reports for the period 01 April 2016 to 31 March 2021.                                                                                                                       |

## Codebook

| Name                                        | Files | References |
|---------------------------------------------|-------|------------|
| Aim of programme                            | 6     | 22         |
| Programme description                       | 5     | 29         |
| Application process                         | 2     | 2          |
| Advertisement                               | 3     | 5          |
| Barriers to policy implementation           | 2     | 2          |
| Challenges                                  | 5     | 27         |
| Aspirations hindered by lack of funds       | 1     | 3          |
| Dynamism of the health system               | 1     | 2          |
| Failure to employ beneficiaries             | 1     | 3          |
| Feeling entitled                            | 1     | 1          |
| Relevance of training for country of origin | 1     | 3          |
| Unintended consequences                     | 3     | 7          |
| Training professionals for other countries  | 2     | 8          |
| Beneficiary characteristics                 | 6     | 37         |
| Historical funding or debt                  | 1     | 1          |



| Name                                          | Files | References |
|-----------------------------------------------|-------|------------|
| Previous discriminatory practices             | 1     | 1          |
| Beneficiary obligations                       | 6     | 44         |
| Loan repayment terms                          | 4     | 15         |
| How are funds recovered                       | 5     | 10         |
| Benefits to individual                        | 2     | 3          |
| Benefits to system                            | 1     | 1          |
| Contents of Policy document                   | 2     | 4          |
| Contents of the contract                      | 6     | 15         |
| Contract Opt-out clause                       | 2     | 4          |
| Contract variation                            | 4     | 8          |
| Contracting process                           | 1     | 1          |
| Power differential                            | 1     | 1          |
| Timing of contract signing                    | 2     | 3          |
| Coordination between departments              | 5     | 20         |
| Intersectoral collaboration                   | 3     | 6          |
| Countries of study                            | 6     | 33         |
| Academic institutions of study                | 3     | 5          |
| International relations and source of funding | 4     | 9          |

| Name                                                    | Files | References |
|---------------------------------------------------------|-------|------------|
| Critical skills shortages                               | 2     | 2          |
| Defaulting of schemes                                   | 6     | 35         |
| How can schemes be strengthened to eliminate defaulting | 1     | 1          |
| Processes in place to track defaulters                  | 4     | 11         |
| Sanctions for breach                                    | 4     | 8          |
| Employment guaranteed                                   | 1     | 3          |
| Employment not guaranteed                               | 3     | 18         |
| Good practice                                           | 1     | 3          |
| Governance of programme                                 | 2     | 7          |
| Aspirations of the programme                            | 1     | 1          |
| Manager's experience                                    | 2     | 5          |
| Organisational structure                                | 2     | 4          |
| Policy custodians                                       | 2     | 5          |
| Recognition of inter-country Regional agreements        | 1     | 4          |
| Weakness in Leadership                                  | 1     | 3          |
| Government responsibilities                             | 2     | 5          |
| Government to Government agreements                     | 1     | 2          |
| Grading of Beneficiaries                                | 2     | 8          |

| Name                                              | Files | References |
|---------------------------------------------------|-------|------------|
| How are beneficiaries recruited into the system   | 2     | 3          |
| How are Beneficiaries selected                    | 4     | 29         |
| Advertisement                                     | 3     | 4          |
| Transparency and openness of process              | 1     | 1          |
| How are opportunities advertised                  | 4     | 7          |
| How much fees cost                                | 1     | 1          |
| How Schemes Work in Practice                      | 5     | 15         |
| Cost of the schemes                               | 2     | 5          |
| Incompetence                                      | 1     | 3          |
| Innovation of building internal training capacity | 2     | 2          |
| Insufficient resources                            | 2     | 2          |
| Internal Programme Capacity                       | 2     | 3          |
| Lack of job availability                          | 2     | 3          |
| Lessons to learn                                  | 1     | 2          |
| Loopholes                                         | 5     | 35         |
| Monitoring during their studies                   | 2     | 2          |
| Monitoring post education                         | 4     | 14         |
| Information systems                               | 4     | 17         |

| Name                                                                 | Files | References |
|----------------------------------------------------------------------|-------|------------|
| Information availability and archiving                               | 5     | 12         |
| Interoperable Information System                                     | 3     | 14         |
| Needs determination                                                  | 6     | 28         |
| Needs of country                                                     | 3     | 7          |
| New Node                                                             | 0     | 0          |
| Programme policy is looking to overcome                              | 1     | 1          |
| Number of beneficiaries                                              | 4     | 11         |
| Number of potential beneficiaries                                    | 4     | 7          |
| Number of times contract is signed                                   | 2     | 4          |
| Opportunities                                                        | 2     | 4          |
| Commodifying health professionals who cannot be placed in employment | 1     | 5          |
| Origins of the scheme                                                | 6     | 17         |
| Policy development framework                                         | 3     | 3          |
| Placement into employment                                            | 5     | 18         |
| Planning and budgeting                                               | 5     | 21         |
| Driver of planning and skills needs determination                    | 2     | 7          |

| Name                                         | Files | References |
|----------------------------------------------|-------|------------|
| Plans to review policy                       | 5     | 11         |
| Reasons for need to review policy (outdated) | 3     | 11         |
| Policies should allow for some flexibility   | 1     | 5          |
| Policy document                              | 3     | 7          |
| Policy Evaluation                            | 3     | 3          |
| Policy evolution                             | 1     | 3          |
| Poor academic performance                    | 4     | 9          |
| Possible solutions                           | 2     | 3          |
| Professional Registration post qualification | 1     | 1          |
| Programme exclusion criteria                 | 1     | 3          |
| Scheme configuration                         | 0     | 0          |
| Academic programmes                          | 6     | 37         |
| Scheme types                                 | 4     | 17         |
| Social Responsibility                        | 3     | 7          |
| Need to address equity                       | 2     | 2          |
| Sustainability                               | 5     | 14         |
| Universality of skills                       | 1     | 1          |
| What is covered by funding                   | 3     | 7          |

## Checklist for the use and reporting of document analysis (CARDA)

| Section and topic                                  | Checklist item                                                                                                                                                                                                                                                    | Response/Action |
|----------------------------------------------------|-------------------------------------------------------------------------------------------------------------------------------------------------------------------------------------------------------------------------------------------------------------------|-----------------|
| Title                                              | Identify the study involved in document analysis.                                                                                                                                                                                                                 | Done            |
| Abstract                                           | Identify the methods as mixed (listing the methods) or solely document analysis.                                                                                                                                                                                  | Done            |
| Rationale                                          | Describe the rationale for the use of documents in the study.                                                                                                                                                                                                     | Done            |
| Objectives                                         | Provide an explicit statement of the research objective(s) or question(s) of the study.                                                                                                                                                                           | Done            |
| Eligibility criteria                               | Specify the eligibility criteria for including documents as data in this specific study.                                                                                                                                                                          | Done            |
| Document corpus                                    |                                                                                                                                                                                                                                                                   |                 |
| Specify the nature of the documents in the corpus: | How many documents there were.                                                                                                                                                                                                                                    | Done            |
|                                                    | What kinds of documents were involved (e.g., local curriculum guides and national policy papers)                                                                                                                                                                  | Done            |
|                                                    | The documents' media (print, electronic etc.).                                                                                                                                                                                                                    | Done            |
|                                                    | The original purposes of the document where existing documents were used (e.g., Target audience. Who produced them, when and why?)                                                                                                                                | Done            |
|                                                    | Include a table or equivalent documentation of all the documents used (either in the paper or as a supplementary table).                                                                                                                                          | Done            |
| Document provenance                                | State whether the documents were study-specific or elicited (created as part of data collection, e.g., field notes and diary entries) or existing (extant) documents (e.g., meeting minutes, prospectuses, policy or historical documents).                       | Done            |
| Where documents were study-specific, specify:      | How they were elicited and from whom.                                                                                                                                                                                                                             | Done            |
|                                                    | Whether they were researcher- or participant-created. For example, where diary entries or reflective writing are used and explain why the rationale behind the target group of participants and the guidance given to participants in respect of producing texts. | N/A             |
|                                                    | When the documents were created and when they were collected as part of the study (e.g., January 2020 to the end of December 2020).                                                                                                                               | Done            |
| Where existing documents were used, specify:       | How the documents were identified (e.g., archives or websites searched).                                                                                                                                                                                          | Done            |
|                                                    | If appropriate, present the full search strategies for document identification, including any filters and limits used (e.g., English language only and particular websites only).                                                                                 | Done            |
|                                                    | The data limits of any searches and the rationale for these data limits.                                                                                                                                                                                          | N/A             |
| Document collection and management                 | How documents were obtained, managed etc.                                                                                                                                                                                                                         | Done            |
|                                                    | Report if any of the documents used are publicly available and where they can be found.                                                                                                                                                                           | Done            |

|                                                                                              |                                                                                                                                                                           |                                                                          |
|----------------------------------------------------------------------------------------------|---------------------------------------------------------------------------------------------------------------------------------------------------------------------------|--------------------------------------------------------------------------|
| Document quality                                                                             | Consider the “quality” of the documents and the relation of document quality to the study objectives.                                                                     | Done                                                                     |
| For existing documents:                                                                      | Were they complete?                                                                                                                                                       | Done                                                                     |
|                                                                                              | Were there gaps in the documents? Were they redacted?                                                                                                                     | Done                                                                     |
|                                                                                              | Did you need to do more searching or rely on additional documents than planned?                                                                                           | Done                                                                     |
|                                                                                              | Were some documents not available or accessible?                                                                                                                          | Done                                                                     |
| For elicited documents:                                                                      | Did participants engage in the process as intended?                                                                                                                       | Done                                                                     |
|                                                                                              | Were the data comprehensive or sparse?                                                                                                                                    | Done                                                                     |
|                                                                                              | How much researcher effort was required to elicit the data, and what might be the implications of researcher interventions (e.g., frequent reminders)?                    | Done                                                                     |
| Reflexivity/positionality (may be placed in the methods or discussion section of your paper) | Role and experience of researchers, experience in DA and positionality.                                                                                                   | Done but separated from main document to comply with journal guidelines. |
|                                                                                              | Consider the potential presence of positionalities, both in a document and of the researcher(s)                                                                           | Done                                                                     |
| Preliminary data analysis                                                                    | Specify the approach to preliminary or organising data analysis, the methods used to collect data from documents; often using variations on thematic or content analyses. | Done                                                                     |
|                                                                                              | Specify if any automation tools were used in the process (e.g., AntConc and Wordsmith).                                                                                   | Done                                                                     |
| Document analysis                                                                            |                                                                                                                                                                           |                                                                          |
| Outline the analytical steps taken—what methodology or methods were involved?                | Explain whether the analysis focused on content, latent content, linguistics or some other document content or characteristics.                                           | Done                                                                     |
|                                                                                              | To what extent and in what ways did analysts immerse or attune themselves to the content, style, subtexts and other dimensions of the documents they analysed?            | Done                                                                     |
|                                                                                              | Was a theoretical lens used to ensure transferability?                                                                                                                    |                                                                          |

## COREQ (CONsolidated criteria for REporting Qualitative research) Checklist

A checklist of items that should be included in reports of qualitative research. You must report the page number in your manuscript where you consider each of the items listed in this checklist. If you have not included this information, either revise your manuscript accordingly before submitting or note N/A.

| Topic                                          | Item No. | Guide Questions/Description                                                                                                                              | Reported on Page No. |
|------------------------------------------------|----------|----------------------------------------------------------------------------------------------------------------------------------------------------------|----------------------|
| <b>Domain 1: Research team and reflexivity</b> |          |                                                                                                                                                          |                      |
| <i>Personal characteristics</i>                |          |                                                                                                                                                          |                      |
| Interviewer/facilitator                        | 1        | Which author/s conducted the interview or focus group?                                                                                                   |                      |
| Credentials                                    | 2        | What were the researcher's credentials? E.g. PhD, MD                                                                                                     |                      |
| Occupation                                     | 3        | What was their occupation at the time of the study?                                                                                                      |                      |
| Gender                                         | 4        | Was the researcher male or female?                                                                                                                       |                      |
| Experience and training                        | 5        | What experience or training did the researcher have?                                                                                                     |                      |
| <i>Relationship with participants</i>          |          |                                                                                                                                                          |                      |
| Relationship established                       | 6        | Was a relationship established prior to study commencement?                                                                                              |                      |
| Participant knowledge of the interviewer       | 7        | What did the participants know about the researcher? e.g. personal goals, reasons for doing the research                                                 |                      |
| Interviewer characteristics                    | 8        | What characteristics were reported about the inter viewer/facilitator? e.g. Bias, assumptions, reasons and interests in the research topic               |                      |
| <b>Domain 2: Study design</b>                  |          |                                                                                                                                                          |                      |
| <i>Theoretical framework</i>                   |          |                                                                                                                                                          |                      |
| Methodological orientation and Theory          | 9        | What methodological orientation was stated to underpin the study? e.g. grounded theory, discourse analysis, ethnography, phenomenology, content analysis |                      |
| <i>Participant selection</i>                   |          |                                                                                                                                                          |                      |
| Sampling                                       | 10       | How were participants selected? e.g. purposive, convenience, consecutive, snowball                                                                       |                      |
| Method of approach                             | 11       | How were participants approached? e.g. face-to-face, telephone, mail, email                                                                              |                      |
| Sample size                                    | 12       | How many participants were in the study?                                                                                                                 |                      |
| Non-participation                              | 13       | How many people refused to participate or dropped out? Reasons?                                                                                          |                      |
| <i>Setting</i>                                 |          |                                                                                                                                                          |                      |
| Setting of data collection                     | 14       | Where was the data collected? e.g. home, clinic, workplace                                                                                               |                      |
| Presence of non-participants                   | 15       | Was anyone else present besides the participants and researchers?                                                                                        |                      |
| Description of sample                          | 16       | What are the important characteristics of the sample? e.g. demographic data, date                                                                        |                      |
| <i>Data collection</i>                         |          |                                                                                                                                                          |                      |
| Interview guide                                | 17       | Were questions, prompts, guides provided by the authors? Was it pilot tested?                                                                            |                      |
| Repeat interviews                              | 18       | Were repeat inter views carried out? If yes, how many?                                                                                                   |                      |
| Audio/visual recording                         | 19       | Did the research use audio or visual recording to collect the data?                                                                                      |                      |
| Field notes                                    | 20       | Were field notes made during and/or after the inter view or focus group?                                                                                 |                      |
| Duration                                       | 21       | What was the duration of the inter views or focus group?                                                                                                 |                      |
| Data saturation                                | 22       | Was data saturation discussed?                                                                                                                           |                      |
| Transcripts returned                           | 23       | Were transcripts returned to participants for comment and/or                                                                                             |                      |



| Topic                                  | Item No. | Guide Questions/Description                                                                                                        | Reported on Page No. |
|----------------------------------------|----------|------------------------------------------------------------------------------------------------------------------------------------|----------------------|
|                                        |          | correction?                                                                                                                        |                      |
| <b>Domain 3: analysis and findings</b> |          |                                                                                                                                    |                      |
| <i>Data analysis</i>                   |          |                                                                                                                                    |                      |
| Number of data coders                  | 24       | How many data coders coded the data?                                                                                               |                      |
| Description of the coding tree         | 25       | Did authors provide a description of the coding tree?                                                                              |                      |
| Derivation of themes                   | 26       | Were themes identified in advance or derived from the data?                                                                        |                      |
| Software                               | 27       | What software, if applicable, was used to manage the data?                                                                         |                      |
| Participant checking                   | 28       | Did participants provide feedback on the findings?                                                                                 |                      |
| <i>Reporting</i>                       |          |                                                                                                                                    |                      |
| Quotations presented                   | 29       | Were participant quotations presented to illustrate the themes/findings?<br>Was each quotation identified? e.g. participant number |                      |
| Data and findings consistent           | 30       | Was there consistency between the data presented and the findings?                                                                 |                      |
| Clarity of major themes                | 31       | Were major themes clearly presented in the findings?                                                                               |                      |
| Clarity of minor themes                | 32       | Is there a description of diverse cases or discussion of minor themes?                                                             |                      |

Developed from: Tong A, Sainsbury P, Craig J. Consolidated criteria for reporting qualitative research (COREQ): a 32-item checklist for interviews and focus groups. *International Journal for Quality in Health Care*. 2007. Volume 19, Number 6: pp. 349 – 357

**Once you have completed this checklist, please save a copy and upload it as part of your submission. DO NOT include this checklist as part of the main manuscript document. It must be uploaded as a separate file.**
